# Supplementary material for: The Protective Function and Modification of Secondary Metabolite Accumulation in Response to Light Stress in Dracocephalum forrestii Shoots
Source: MDPI journal article supplement (doi:10.3390/ijms22157965), 2021-07-26
Supplement: s1 [file s1]

## Supplementary Material

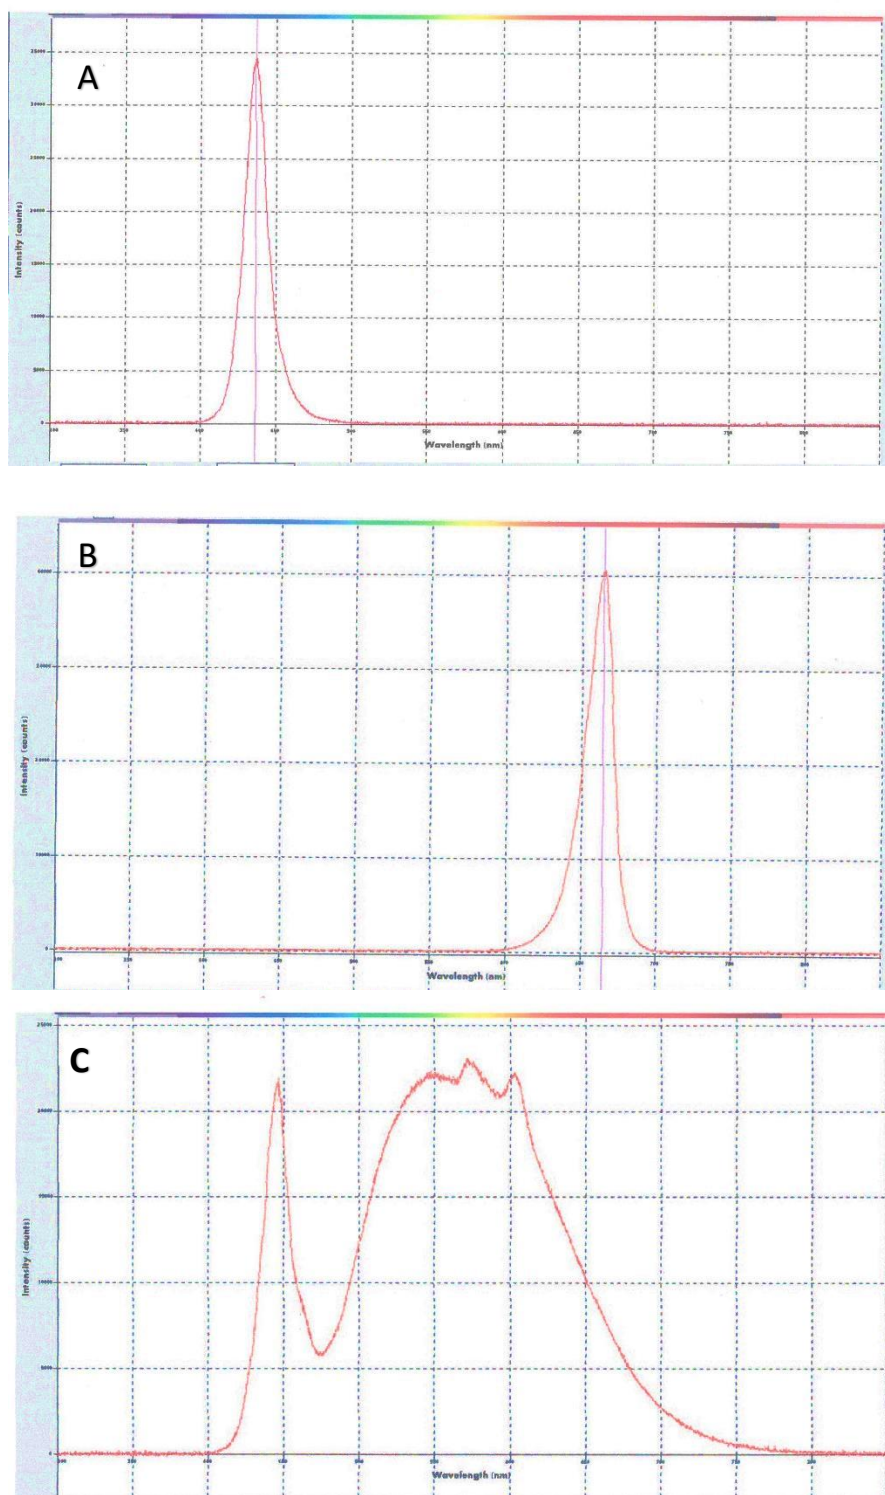

**Figure S1.** The spectral characterisation of used LEDs: A) blue LED (430 nm), B) red LED (670 nm), C) white LED (390–760 nm). Red/blue LED was mixed red (70%) and blue (30%) LED.
